# Supplementary material
Source: PubMed Central journal article supplement (PMC122449)
Supplement: pnas_052706999_1.pdf [file pnas_052706999_1.pdf]

Supporting information for Horak *et al.* (February 26, 2002) *Proc. Natl. Acad. Sci. USA*, 10.1073/pnas.052706999.

**Table 1. Summary of chIp-chip experimental conditions**

| <b>Experiment number</b> | <b>Cy3-labeled DNA</b> | <b>Cy5-labeled DNA</b> | <b>Number of cells</b> | <b>Cell line</b> | <b>Antibody</b>          | <b>Hemin induction</b> |
|--------------------------|------------------------|------------------------|------------------------|------------------|--------------------------|------------------------|
| 1                        | $\alpha$ -GATA1 IPDNA  | $\alpha$ -GAL4 IPDNA   | $4 \times 10^8$        | K562             | $\alpha$ -GATA1(C20)     | No                     |
| 2                        | $\alpha$ -GATA1 IPDNA  | $\alpha$ -GAL4 IPDNA   | $4 \times 10^8$        | K562             | $\alpha$ -GATA1(N6)      | No                     |
| 3                        | $\alpha$ -GATA1 IPDNA  | $\alpha$ -HA IPDNA     | $1 \times 10^8$        | K562             | $\alpha$ -GATA1(C20)     | No                     |
| 4                        | $\alpha$ -GATA1 IPDNA  | K562 lysate DNA        | $1 \times 10^8$        | K562             | $\alpha$ -GATA1(C20)     | No                     |
| 5                        | $\alpha$ -GATA1 IPDNA  | K562 lysate DNA        | $1 \times 10^8$        | K562             | $\alpha$ -GATA1(C20)     | No                     |
| 6                        | $\alpha$ -GATA1 IPDNA  | K562 lysate DNA        | $1 \times 10^8$        | K562             | $\alpha$ -GATA1(aa66–78) | No                     |
| 7                        | $\alpha$ -GATA1 IPDNA  | K562 lysate DNA        | $2 \times 10^8$        | K562             | $\alpha$ -GATA1(aa66–78) | Yes                    |
| 8                        | $\alpha$ -GATA1 IPDNA  | K562 lysate DNA        | $2 \times 10^8$        | K562             | $\alpha$ -GATA1(aa66–78) | Yes                    |
| 9                        | No antibody IPDNA      | K562 lysate DNA        | $1 \times 10^8$        | K562             | No antibody              | No                     |
| 10                       | No antibody IPDNA      | K562 lysate DNA        | $2 \times 10^8$        | K562             | No antibody              | No                     |
| 11                       | No antibody IPDNA      | K562 lysate DNA        | $1 \times 10^8$        | K562             | No antibody              | No                     |
| 12                       | Preimmune sera IPDNA   | K562 lysate DNA        | $1 \times 10^8$        | K562             | Rabbit preimmune sera    | No                     |
| 13                       | $\alpha$ -GATA1 IPDNA  | K562 lysate DNA        | $1 \times 10^8$        | HeLa             | $\alpha$ -GATA1(C20)     | No                     |
