# Supplementary material
Source: PubMed Central journal article supplement (PMC122449)
Supplement: pnas_052706999_2.pdf [file pnas_052706999_2.pdf]

**Table 2. Primer sequences and 5' positions within the  $\beta$ -globin locus**

| Relevant features | Fragment number | Primer name | Primer sequence               | 5' nucleotide |
|-------------------|-----------------|-------------|-------------------------------|---------------|
| None              | 001BG           | hBG1F       | 5'-gaattctaattcctcctc-3'      | 1             |
| None              | 001BG           | hBG2R       | 5'-cgcccccttctgtactgg-3'      | 985           |
| HS4               | 002BG           | hBG3F       | 5'-cagggtatatgtagacatctc-3'   | 986           |
| HS4               | 002BG           | hBG4R       | 5'-ctacactcccattgggtgac-3'    | 2027          |
| None              | 003BG           | hBG5F       | 5'-tgcaaaatctcggctcactgc-3'   | 2028          |
| None              | 003BG           | hBG6R       | 5'-ttaacctactaactgaagac-3'    | 3017          |
| None              | 004BG           | hBG7F       | 5'-ctttgtgaagtgaaaactgtg-3'   | 3018          |
| None              | 004BG           | hBG8R       | 5'-catccatcacgtatgctc-3'      | 4118          |
| HS3               | 005BG           | hBG9F       | 5'-agtaagagaggagagggaagg-3'   | 4119          |
| HS3               | 005BG           | hBG173F     | 5'-caggagtcttaaggacttg-3'     | 4476          |
| HS3               | 005BG           | hBG174R     | 5'-cataggagtcaaggcactgc-3'    | 4850          |
| HS3               | 005BG           | hBG10R      | 5'-acatcaggctctgagactgg-3'    | 5075          |
| None              | 006BG           | hBG11F      | 5'-taatttagcaatggctggg-3'     | 5076          |
| None              | 006BG           | hBG12R      | 5'-aatgtagacagtaggagagc-3'    | 6101          |
| None              | 007BG           | hBG13F      | 5'-acatgagcttattaactgg-3'     | 6102          |
| None              | 007BG           | hBG14R      | 5'-ggcaatacaagacctgag-3'      | 7057          |
| None              | 008BG           | hBG15F      | 5'-cagtgacatgcacactggtc-3'    | 7058          |
| None              | 008BG           | hBG16R      | 5'-tcagcctccaaagtgtg-3'       | 8066          |
| HS2               | 009BG           | hBG17F      | 5'-ggtgggtggactgctggagc-3'    | 8067          |
| None              | 009BG           | hBG151R     | 5'-gctggccagaactgctca-3'      | 8576          |
| HS2               | 009BG           | hBG152F     | 5'-ccctgctggggtcagtgcc-3'     | 8577          |
| HS2               | 009BG           | hBG175R     | 5'-cacattctgtctcaggcatcc-3'   | 8853          |
| None              | 009BG           | hBG154F     | 5'-cataaagaaaatggatgcct-3'    | 8821          |
| HS2               | 009BG           | hBG18R      | 5'-agcatgtctcctaacagc-3'      | 9204          |
| None              | 010BG           | hBG19F      | 5'-cacatacgggtcagatctg-3'     | 9205          |
| None              | 010BG           | hBG20R      | 5'-ttaggctgtgacctctgc-3'      | 10596         |
| None              | 011BG           | hBG21F      | 5'-cgaacagaattctgtctgattg-3'  | 10941         |
| None              | 011BG           | hBG155F     | 5'-cttctgcttctaccactgc-3'     | 11467         |
| None              | 011BG           | hBG22R      | 5'-cgctactttaagtagtatgg-3'    | 12022         |
| None              | 012BG           | hBG23F      | 5'-atacccttcaccctgtcc-3'      | 12023         |
| None              | 012BG           | hBG190R     | 5'-gttgatatgtgttgactgctc-3'   | 12261         |
| None              | 012BG           | hBG191F     | 5'-aaggatgtatgctgacacatcc-3'  | 12271         |
| None              | 012BG           | hBG192R     | 5'-cttacataaacatgagtgtc-3'    | 12545         |
| None              | 012BG           | hBG193F     | 5'-caattaattgttcatcagtcagg-3' | 12546         |
| None              | 012BG           | hBG194R     | 5'-tggacagccaggaagcacag-3'    | 12754         |
| None              | 012BG           | hBG195F     | 5'-gtccaaatctctaatgataagc-3'  | 12782         |
| None              | 012BG           | hBG24R      | 5'-ggaacatcacacactggggcc-3'   | 13050         |
| HS1               | 013BG           | hBG25F      | 5'-cctccctgtgtccatggatc-3'    | 13051         |
| HS1               | 013BG           | hBG176F     | 5'-ctgagaaggcaatagcaggagc-3'  | 13389         |
| HS1               | 013BG           | hBG177R     | 5'-gacactagtgtcaccagtctcc-3'  | 13678         |
| HS1               | 013BG           | hBG26R      | 5'-gtgctagaactgagaagtc-3'     | 14191         |
| None              | 014BG           | hBG27F      | 5'-tagagtggaatcttagc-3'       | 14192         |
| None              | 014BG           | hBG28R      | 5'-agatgatctcatcactcagg-3'    | 14977         |
| None              | 015BG           | hBG29F      | 5'-atacaacaaccccttgac-3'      | 14978         |
| None              | 015BG           | hBG30R      | 5'-tctcattattgcttcgatgc-3'    | 16034         |
| None              | 016BG           | hBG31F      | 5'-ctgcccgcagcctacctgac-3'    | 16035         |
| None              | 016BG           | hBG32R      | 5'-aagatctgaatacctatgg-3'     | 16914         |
| None              | 017BG           | hBG33F      | 5'-attgcagatattttaattcac-3'   | 17219         |

| Relevant features | Fragment number | Primer name | Primer sequence              | 5' nucleotide |
|-------------------|-----------------|-------------|------------------------------|---------------|
| None              | 017BG           | hBG34R      | 5'-ccatccatttctaccatttc-3'   | 17919         |
| ε-PROMOTER        | 018BG           | hBG35F      | 5'-atggatgtagaacaagccag-3'   | 17920         |
| ε-PROMOTER        | 018BG           | hBG178F     | 5'-gagcctcaggatccagcacac-3'  | 19299         |
| ε-PROMOTER        | 018BG           | hBG36R      | 5'-gatgccaggcctgagagcttgc-3' | 19540         |
| ε                 | 019BG           | hBG37F      | 5'-atggtgcattttactgctgagg-3' | 19541         |
| ε                 | 019BG           | hBG149R     | 5'-tccaggggtaaacacagag-3'    | 19777         |
| ε                 | 019BG           | hBG38R      | 5'-ttgaagtctcaggatccac-3'    | 19976         |
| ε                 | 020BG           | hBG39F      | 5'-ggtgagttcaggtgctggtg-3'   | 19977         |
| ε                 | 020BG           | hBG40R      | 5'-tcagtggctactatggccag-3'   | 20961         |
| None              | 021BG           | hBG41F      | 5'-gttctctccagtttgcagg-3'    | 20962         |
| None              | 021BG           | hBG42R      | 5'-ttgaaccattgtatctgtcc-3'   | 22056         |
| None              | 022BG           | hBG43F      | 5'-acccaagaggagcagtgag-3'    | 22057         |
| None              | 022BG           | hBG44R      | 5'-ttaattgaaagccctgaagc-3'   | 23099         |
| L1                | 023BG           | hBG45F      | 5'-cataatgacctctgttcc-3'     | 23100         |
| L1                | 023BG           | hBG46R      | 5'-aacaatgagtcgggatagc-3'    | 24047         |
| L1                | 024BG           | hBG47F      | 5'-gaatagggtgcccttccc-3'     | 24048         |
| L1                | 024BG           | hBG48R      | 5'-cggtttacaagacatacc-3'     | 24997         |
| L1                | 025BG           | hBG49F      | 5'-attttctgagtttagtc-3'      | 24998         |
| L1                | 025BG           | hBG50R      | 5'-cacacaccaggcctgtcg-3'     | 26067         |
| L1                | 026BG           | hBG51F      | 5'-atgtcccctccctgttcc-3'     | 26068         |
| L1                | 026BG           | hBG52R      | 5'-ctgaaactgtacccttcc-3'     | 27084         |
| L1                | 027BG           | hBG53F      | 5'-ttttatcatattgctagcc-3'    | 27085         |
| L1                | 027BG           | hBG54R      | 5'-gtcaacaatgaaatcaagac-3'   | 28008         |
| L1                | 028BG           | hBG55F      | 5'-ccaatgatcattcaggagc-3'    | 28009         |
| L1                | 028BG           | hBG56R      | 5'-tcagcagaaacgtaaaagc-3'    | 29078         |
| L1                | 029BG           | hBG57F      | 5'-gaaatctgctgtaaatctg-3'    | 29097         |
| L1                | 029BG           | hBG58R      | 5'-ggagtctgtagacctgatgg-3'   | 30025         |
| L1                | 030BG           | hBG59F      | 5'-aggctgtactgggtttgtc-3'    | 30026         |
| L1                | 030BG           | hBG60R      | 5'-cagattgctcatgtaggacc-3'   | 31081         |
| None              | 031BG           | hBG61F      | 5'-cttcttcagagggtgtgtg-3'    | 31082         |
| None              | 031BG           | hBG62R      | 5'-tgetcctcctcagactaagg-3'   | 32386         |
| None              | 032BG           | hBG63F      | 5'-caccagtctctgacacattc-3'   | 32746         |
| None              | 032BG           | hBG197F     | 5'-ggaagatactgataagttgac-3'  | 32973         |
| None              | 032BG           | hBG196R     | 5'-cagtatctccagttactcac-3'   | 32983         |
| None              | 032BG           | hBG198R     | 5'-tggaatctggcttattggag-3'   | 33241         |
| None              | 032BG           | hBG199F     | 5'-gtttctgacgtcataatctacc-3' | 33244         |
| None              | 032BG           | hBG201F     | 5'-caataaaacagtcctgcctc-3'   | 33475         |
| None              | 032BG           | hBG200R     | 5'-attgactaatagtccacacac-3'  | 33477         |
| None              | 032BG           | hBG64R      | 5'-atgatgtgtattatcactgg-3'   | 33708         |
| γG-PROMOTER       | 033BG           | hBG65F      | 5'-cgggtgcctacatacatacc-3'   | 33709         |
| None              | 033BG           | hBG156R     | 5'-gttttaggcataggtccagg-3'   | 34034         |
| None              | 033BG           | hBG157F     | 5'-acatttcacaatccctgaac-3'   | 34035         |
| None              | 033BG           | hBG158R     | 5'-tagcctttgccttgttccg-3'    | 34240         |
| γG-PROMOTER       | 033BG           | hBG159F     | 5'-attaagcagcagtatcctc-3'    | 34249         |
| γG-PROMOTER       | 033BG           | hBG66R      | 5'-ggcgtctggactaggagc-3'     | 34530         |
| γG-PROMOTER       | 033BG           | hBG160R     | 5'-cttcccagggtttctctcc-3'    | 34622         |
| γG                | 034BG           | hBG67F      | 5'-atgggtcatttcacagagg-3'    | 34531         |
| γG                | 034BG           | hBG68R      | 5'-cttgaagttctcaggatccac-3'  | 34967         |
| γG                | 035BG           | hBG69F      | 5'-gtgagtccaggagatgttccag-3' | 34968         |
| γG                | 035BG           | hBG70R      | 5'-tcagtggatctggaggacagg-3'  | 35982         |
| None              | 036BG           | hBG71F      | 5'-gctcactgccatgatgcagag-3'  | 35983         |
| None              | 036BG           | hBG72R      | 5'-agcgttaagttcataacacc-3'   | 37003         |
| None              | 037BG           | hBG73F      | 5'-tgtgtctccagaaaattcac-3'   | 37004         |

| Relevant features      | Fragment number | Primer name | Primer sequence                | 5' nucleotide |
|------------------------|-----------------|-------------|--------------------------------|---------------|
| None                   | 037BG           | hBG74R      | 5'-atcttcaaattagttatcc-3'      | 38162         |
| $\gamma$ A-PROMOTER    | 038BG           | hBG75F      | 5'-acagcttgccctccgataagc-3'    | 38163         |
| $\gamma$ A-PROMOTER    | 038BG           | hBG76R      | 5'-ggcgtctggactaggagcttattg-3' | 39466         |
| $\gamma$ A             | 039BG           | hBG77F      | 5'-atgggtcatttcacagagg-3'      | 39467         |
| $\gamma$ A             | 039BG           | hBG78R      | 5'-cttgaagtctcaggatcc-3'       | 39903         |
| $\gamma$ A             | 040BG           | hBG79F      | 5'-gtgagtcaggagatgttcagc-3'    | 39904         |
| $\gamma$ A             | 040BG           | hBG80R      | 5'-tcagtggatctggaggacag-3'     | 40898         |
| $\gamma$ A 3'-ENHANCER | 041BG           | hBG81F      | 5'-gcctctgcccattgattcagag-3'   | 40899         |
| $\gamma$ A 3'-ENHANCER | 041BG           | hBG180F     | 5'-ctgtgagatcaaaatgtagtgg-3'   | 41639         |
| $\gamma$ A 3'-ENHANCER | 041BG           | hBG82R      | 5'-gcggacttctcactgtg-3'        | 41971         |
| None                   | 042BG           | hBG83F      | 5'-catctgcaatccaggaagagaacc-3' | 41972         |
| None                   | 042BG           | hBG84R      | 5'-ccaaaattaactccggatgg-3'     | 43141         |
| None                   | 043BG           | hBG85F      | 5'-ataaggtataaggaaggag-3'      | 43142         |
| None                   | 043BG           | hBG161R     | 5'-ttcattcatatgccatcc-3'       | 43459         |
| None                   | 043BG           | hBG162F     | 5'-acttcatggatgacatatgg-3'     | 43460         |
| None                   | 043BG           | hBG163R     | 5'-tcagccaaccaggaattcgg-3'     | 43740         |
| None                   | 043BG           | hBG164F     | 5'-tggaagatggggcaactgt-3'      | 43741         |
| None                   | 043BG           | hBG86R      | 5'-tacttgatatattgagagg-3'      | 44068         |
| L1                     | 044BG           | hBG87F      | 5'-gactaaaatattgtgtctc-3'      | 44069         |
| L1                     | 044BG           | hBG165R     | 5'-ctcatgtgctgcacgtctc-3'      | 44359         |
| L1                     | 044BG           | hBG166F     | 5'-acacgtgcagcagcctgtgg-3'     | 44360         |
| L1                     | 044BG           | hBG167R     | 5'-aactgggttttattactgtg-3'     | 44691         |
| L1                     | 044BG           | hBG168F     | 5'-ttccccttacttcctagt-3'       | 44692         |
| L1                     | 044BG           | hBG88R      | 5'-cgatctctgctcactgcagc-3'     | 45022         |
| L1                     | 045BG           | hBG89F      | 5'-cgccactgcacactccagcc-3'     | 45023         |
| L1                     | 045BG           | hBG169R     | 5'-atccaggtggcctctcagg-3'      | 45457         |
| L1                     | 045BG           | hBG170F     | 5'-tctatcagaactcgaatgtc-3'     | 45458         |
| L1                     | 045BG           | hBG90R      | 5'-agtgtcagatctgggagttcc-3'    | 45709         |
| L1                     | 045BG           | hBG171R     | 5'-ctgcccagaatctcacctcc-3'     | 45800         |
| $\psi$ $\eta$          | 046BG           | hBG91F      | 5'-gtagtgcatctcactgtgac-3'     | 45710         |
| $\psi$ $\eta$          | 046BG           | hBG92R      | 5'-ccaggaagtctcagggtcc-3'      | 46145         |
| $\psi$ $\eta$          | 047BG           | hBG93F      | 5'-tgagttagtaagtaactcagc-3'    | 46146         |
| $\psi$ $\eta$          | 047BG           | hBG94R      | 5'-tcagtggctcttggggctac-3'     | 47124         |
| None                   | 048BG           | hBG95F      | 5'-gttccctgtccactatgtttg-3'    | 47125         |
| None                   | 048BG           | hBG96R      | 5'-ccttttaactgtgtttgc-3'       | 48170         |
| None                   | 049BG           | hBG97F      | 5'-ctgagattaggaacagc-3'        | 48171         |
| None                   | 049BG           | hBG184F     | 5'-tgtgtccaccccaagagctc-3'     | 48841         |
| None                   | 049BG           | hBG98R      | 5'-tacaagacagcagttgagtg-3'     | 49023         |
| None                   | 050BG           | hBG99F      | 5'-gcatacattaattaagcac-3'      | 49024         |
| None                   | 050BG           | hBG100R     | 5'-ggtccatcaaggaaaggaca-3'     | 50104         |
| None                   | 051BG           | hBG101F     | 5'-aaccattatcagttactcaacc-3'   | 50105         |
| None                   | 051BG           | hBG102R     | 5'-aattatttgagctttgtacc-3'     | 50872         |
| None                   | 052BG           | hBG103F     | 5'-gtgaattttgtagaagg-3'        | 51206         |
| None                   | 052BG           | hBG104R     | 5'-ggaaagaatagcatctactc-3'     | 51960         |
| None                   | 053BG           | hBG105F     | 5'-caaatcctctcaatgcaatcc-3'    | 52296         |
| None                   | 053BG           | hBG106R     | 5'-gtagaattgataaattacgg-3'     | 53285         |
| $\delta$ -PROMOTER     | 054BG           | hBG107F     | 5'-tgttgtaagcatttaagtgg-3'     | 53286         |
| $\delta$ -PROMOTER     | 054BG           | hBG181F     | 5'-aacaactgctgaaagagatcgg-3'   | 54506         |
| $\delta$ -PROMOTER     | 054BG           | hBG108R     | 5'-ggtgtctgtttgaggttgc-3'      | 54789         |
| $\delta$               | 055BG           | hBG109F     | 5'-atggtgcatctgactcctgag-3'    | 54790         |
| $\delta$               | 055BG           | hBG110R     | 5'-cctgaagtctcaggatccac-3'     | 55232         |
| $\delta$               | 056BG           | hBG111F     | 5'-gtgagtcaggagatgcttc-3'      | 55233         |
| $\delta$               | 056BG           | hBG112R     | 5'-tcaatgttactgtgagcc-3'       | 56295         |

| Relevant features    | Fragment number | Primer name | Primer sequence              | 5' nucleotide |
|----------------------|-----------------|-------------|------------------------------|---------------|
| None                 | 057BG           | hBG113F     | 5'-gatcctggactgttctctg-3'    | 56260         |
| None                 | 057BG           | hBG114R     | 5'-cacggagtgtgtgtgtgc-3'     | 57032         |
| None                 | 058BG           | hBG115F     | 5'-ctttataagcaattctgcc-3'    | 57033         |
| None                 | 058BG           | hBG116R     | 5'-gctcggcacatgtcccatcc-3'   | 58022         |
| None                 | 059BG           | hBG117F     | 5'-aacacaattactatatgctagg-3' | 58023         |
| None                 | 059BG           | hBG185F     | 5'-taatgaacaaggtgcagactg-3'  | 58864         |
| None                 | 059BG           | hBG118R     | 5'-agtaaacaactcagcagc-3'     | 59110         |
| None                 | 060BG           | hBG119F     | 5'-gagagattgtgtatctgcg-3'    | 59111         |
| None                 | 060BG           | hBG120R     | 5'-ccttcttaagacttacc-3'      | 59974         |
| None                 | 061BG           | hBG121F     | 5'-tgacaatttctccaatcagg-3'   | 59975         |
| None                 | 061BG           | hBG122R     | 5'-aattaaacagcaaaggtagc-3'   | 60949         |
| $\beta$ -PROMOTER    | 062BG           | hBG123F     | 5'-acatctttaatagcaggaagc-3'  | 60950         |
| $\beta$ -PROMOTER    | 062BG           | hBG182F     | 5'-caattgtactgatggtatgg-3'   | 61907         |
| $\beta$ -PROMOTER    | 062BG           | hBG124R     | 5'-ggtgtctgtttgaggtgc-3'     | 62186         |
| $\beta$              | 063BG           | hBG125F     | 5'-atggtgcacctgactcc-3'      | 62187         |
| $\beta$              | 063BG           | hBG126R     | 5'-cctgaagtctcaggatcc-3'     | 62631         |
| $\beta$              | 064BG           | hBG127F     | 5'-gtgagtctatggacccttg-3'    | 62632         |
| $\beta$              | 064BG           | hBG128R     | 5'-ttagtgatactgtgggcc-3'     | 63610         |
| $\beta$ -3'-ENHANCER | 065BG           | hBG129F     | 5'-gctcgcttcttctgtgcc-3'     | 63611         |
| $\beta$ -3'-ENHANCER | 065BG           | hBG188F     | 5'-tcacagtgacccggaatctgc-3'  | 64280         |
| $\beta$ -3'-ENHANCER | 065BG           | hBG189R     | 5'-tgctaataactgcagagccag-3'  | 64570         |
| $\beta$ -3'-ENHANCER | 065BG           | hBG130R     | 5'-actgcagagccagaagcacc-3'   | 64562         |
| None                 | 066BG           | hBG131F     | 5'-tattagcatagtgttacc-3'     | 64563         |
| None                 | 066BG           | hBG132R     | 5'-tttgcaaatTTTaaataac-3'    | 65489         |
| L1                   | 067BG           | hBG133F     | 5'-tttagatggagtttgctc-3'     | 65511         |
| L1                   | 067BG           | hBG134R     | 5'-atcgattgtgtatatgcag-3'    | 66585         |
| L1                   | 068BG           | hBG135F     | 5'-tacacaattaggtgtgaagg-3'   | 66586         |
| L1                   | 068BG           | hBG136R     | 5'-tcaagcctggacaatggtgg-3'   | 67535         |
| L1                   | 069BG           | hBG137F     | 5'-gcaggtaaacaaagccgcc-3'    | 67536         |
| L1                   | 069BG           | hBG138R     | 5'-ccatcactttcagctacacc-3'   | 68598         |
| L1                   | 070BG           | hBG139F     | 5'-ggagaatgaaccaagtgg-3'     | 68599         |
| L1                   | 070BG           | hBG140R     | 5'-cagtgggtgttaaagtctcc-3'   | 69622         |
| L1                   | 071BG           | hBG141F     | 5'-tcaacattagacagatcaacg-3'  | 69623         |
| L1                   | 071BG           | hBG142R     | 5'-tgttattggtctattcagag-3'   | 70531         |
| L1                   | 072BG           | hBG143F     | 5'-ggctctgaaattgaggca-3'     | 70532         |
| L1                   | 072BG           | hBG144R     | 5'-taagcatggaatgttctcc-3'    | 71584         |
| L1                   | 073BG           | hBG145F     | 5'-tgggtaggaagaatcatatcg-3'  | 71585         |
| L1                   | 073BG           | hBG146R     | 5'-gagatggtatctcattgtgg-3'   | 72508         |
| L1                   | 074BG           | hBG147F     | 5'-acaccagttagaatggcga-3'    | 72509         |
| L1                   | 074BG           | hBG150F     | 5'-ggcagggatagcactaggag-3'   | 73066         |
| L1                   | 074BG           | hBG148R     | 5'-gttaactgactgagaaaacac-3'  | 73308         |
